# Supplementary material
Source: PubMed Central journal article supplement (PMC9527074)
Supplement: 40264_2022_1228_MOESM1_ESM.pdf [file 40264_2022_1228_MOESM1_ESM.pdf]

**Article title: mRNA (BNT162b2) and inactivated (CoronaVac) COVID-19 vaccination and risk of adverse events and acute diabetic complications in patients with Type 2 Diabetes Mellitus: A population-based study**

**Journal name: Drug Safety**

Author List: Eric Yuk Fai Wan, PhD<sup>1,2,3†</sup>, Celine Sze Ling Chui, PhD<sup>3,4,5†</sup>, Anna Hoi Ying Mok, MCP<sup>2</sup>, Wanchun Xu, MPhil<sup>2</sup>, Vincent Ka Chun Yan, BPharm<sup>1</sup>, Francisco Tsz Tsun Lai, PhD<sup>1,3</sup>, Xue Li, PhD<sup>1,3,6</sup>, Carlos King Ho Wong, PhD<sup>1,2,3</sup>, Esther Wai Yin Chan, PhD<sup>1,3</sup>, David Tak Wai Lui, MBBS<sup>6</sup>, Kathryn Choon Beng Tan, MD<sup>6</sup>, Ivan Fan Ngai Hung, MD<sup>6,8</sup>, Cindy Lo Kuen Lam, MD<sup>2</sup>, Gabriel Matthew Leung, MD<sup>3,5</sup>, Ian Chi Kei Wong, PhD<sup>1,3,7,8\*</sup>

† Co-first author. EYFW and CSLC contributed equally to this article.

\*Corresponding author

1 Centre for Safe Medication Practice and Research, Department of Pharmacology and Pharmacy, Li Ka Shing Faculty of Medicine, The University of Hong Kong, Hong Kong Special Administrative Region, China.

2 Department of Family Medicine and Primary Care, Li Ka Shing Faculty of Medicine, The University of Hong Kong, Hong Kong Special Administrative Region, China.

3 Laboratory of Data Discovery for Health (D24H), Hong Kong Science and Technology Park, Sha Tin, Hong Kong Special Administrative Region, China.

4 School of Nursing, Li Ka Shing Faculty of Medicine, The University of Hong Kong, Hong Kong Special Administrative Region, China.

5 School of Public Health, Li Ka Shing Faculty of Medicine, The University of Hong Kong, Hong Kong Special Administrative Region, China.

6 Department of Medicine, Li Ka Shing Faculty of Medicine, The University of Hong Kong, Hong Kong Special Administrative Region, China.

7 Expert Committee on Clinical Events Assessment Following Covid-19 Immunization, Department of Health, The Government of the Hong Kong Special Administrative Region, Hong Kong Special Administrative Region, China.

8 Research Department of Practice and Policy, School of Pharmacy, University College London, United Kingdom.

Full professors: Kathryn Choon Beng Tan, Ivan Fan Ngai Hung, Cindy Lo Kuen Lam, Gabriel Matthew Leung and Ian Chi Kei Wong.

Address for correspondence:

Professor Ian Chi Kei Wong

Postal Address: L2-57, Laboratory Block, 21 Sassoon Road, Pokfulam, Hong Kong

Email: [wongick@hku.hk](mailto:wongick@hku.hk)

Tel: +852 3917 9441

**Supplementary information. Vaccination program priority groups rollout schedule in Hong Kong**

| Order of expansion | Date of rollout | Vaccination group                                                                                                                                                                                                                                                                                                                                                                                                                                                                     |
|--------------------|-----------------|---------------------------------------------------------------------------------------------------------------------------------------------------------------------------------------------------------------------------------------------------------------------------------------------------------------------------------------------------------------------------------------------------------------------------------------------------------------------------------------|
| First [1]          | Feb 26, 2021    | <ul style="list-style-type: none"> <li>• Healthcare workers and staff involved in anti-epidemic work</li> <li>• Persons aged 60 or above and a maximum of 2 carers accompanying elderly people aged above 70</li> <li>• Residents and staff of residential care homes for the elderly and persons with disabilities</li> <li>• People providing essential public services</li> <li>• People providing cross-boundary transportation or working at control points and ports</li> </ul> |
| Second [2]         | Mar 8, 2021     | <ul style="list-style-type: none"> <li>• Staff of food and beverages premises, markets, supermarkets, convenience stores, couriers and takeaway delivery</li> <li>• Staff of local public transport service operators</li> <li>• Registered construction workers</li> <li>• Staff of property management</li> <li>• Teachers and school staff</li> <li>• Staff in the tourism industry</li> <li>• Staff of scheduled premises under the Prevention and Control of Disease</li> </ul>  |
| Third [3]          | Mar 16, 2021    | <ul style="list-style-type: none"> <li>• People aged between 30 and 59</li> <li>• Students aged 16 or above studying outside Hong Kong</li> <li>• Domestic helpers</li> </ul>                                                                                                                                                                                                                                                                                                         |
| Fourth [4]         | Apr 15, 2021    | <ul style="list-style-type: none"> <li>• People aged 16 to 29 (<math>\geq 18</math> for person receiving CoronaVac)</li> </ul>                                                                                                                                                                                                                                                                                                                                                        |
| Fifth [5]          | Jun 14, 2021    | <ul style="list-style-type: none"> <li>• People aged 12 to 15 for BNT162b2</li> </ul>                                                                                                                                                                                                                                                                                                                                                                                                 |
| Sixth [6]          | Jan 21, 2022    | <ul style="list-style-type: none"> <li>• People aged 5 to 11 for CoronaVac</li> </ul>                                                                                                                                                                                                                                                                                                                                                                                                 |

References:

1. The Government of the Hong Kong Special Administrative Region. Government announces 2019 COVID-19 Vaccination Programme. Press Releases. 18 Feb 2021 (<https://www.info.gov.hk/gia/general/202102/18/P2021021800767.htm?fontSize=1>)
2. The Government of the Hong Kong Special Administrative Region. Government expands scope of priority groups and opens more CVCs. Press Releases. 8 Mar 2021 (<https://www.info.gov.hk/gia/general/202103/08/P2021030800738.htm>)
3. The Government of the Hong Kong Special Administrative Region. Vaccination priority groups to be expanded to cover people aged 30 or above. Press Releases. 15 Mar 2021 (<https://www.info.gov.hk/gia/general/202103/15/P2021031500626.htm?fontSize=1>)

4. The Government of the Hong Kong Special Administrative Region. COVID-19 Vaccination Programme opens to persons aged 16 or above. Press Releases. 15 Apr 2021 (<https://www.info.gov.hk/gia/general/202104/15/P2021041500565.htm?fontSize=1>)
5. The Government of the Hong Kong Special Administrative Region. Secretary for Food and Health approves lowering age limit for receiving Comirnaty vaccine. 3 Jun 2021 (<https://www.info.gov.hk/gia/general/202106/03/P2021060300652.htm?fontSize=1>)
6. The Government of the Hong Kong Special Administrative Region. Arrangements for children aged 5 to 11 to receive COVID-19 vaccines. Press Releases. 20 Jan 2022 (<https://www.info.gov.hk/gia/general/202201/20/P2022012000714.htm>)

Supplementary figure 1. Sample size calculation for self-controlled case series analysis

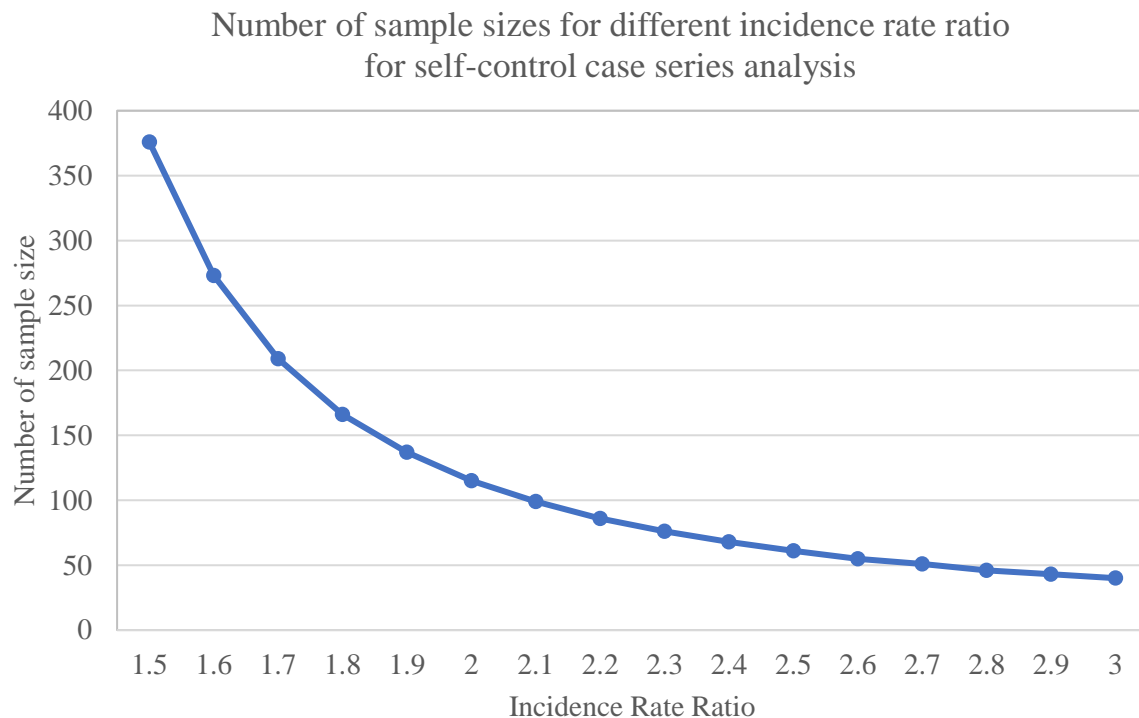

Remark: We assumed the relative risk of ASEI and acute diabetic complications from 1.5 to 3.0 in the exposure period of 21 days after first or second dose. According to the vaccination program in Hong Kong, the maximum observation periods is 342 days from Feb 23, 2021 to Jan 31, 2021 and the predefined risk period is 21 days in first or second dose. To achieve 80% power and detect the incidence rate ratio from 1.5 to 3.0 at 0.05 significant level, the required sample sizes for self-control case series ranging from 40 to 376. The blue points were sample sizes according to different risk ratio from 1.5 to 3.0 by 0.1. The sample size calculation was conducted by R version 4.1.0 (R Foundation for Statistical Computing, Vienna, Austria) [1-2].

#### Reference

1. Musonda, P., Farrington, C. P., and Whitaker, H. (2006). Sample sizes for self-controlled case series studies. *Statistics in Medicine* 25, 2618–2631.
2. Farrington P., Whitaker H., and Ghebremichael-Weldeselassie Y. (2018). *Self-controlled Case Series Studies: A modelling Guide with R*. Boca Raton: Chapman & Hall/CRC Press.
- Tang, Yongqiang. Comments on ‘Sample size evaluation for multiply matched case-control study using the score test from a conditional logistic (discrete Cox PH) regression model. *Stat Med*, 2009;28:175-177.

**Supplementary Table 1. List of the definition of Adverse Events of Special Interest and acute diabetic complications using International Classification of Diseases, Ninth Revision, Clinical Modification (ICD-9-CM) code**

| AESI                                              | ICD-9 codes                                                                                                                                                                                                                              |
|---------------------------------------------------|------------------------------------------------------------------------------------------------------------------------------------------------------------------------------------------------------------------------------------------|
| <b>Auto-immune diseases</b>                       |                                                                                                                                                                                                                                          |
| Guillain-Barré Syndrome                           | 357.0, 357.8x, 357.9                                                                                                                                                                                                                     |
| Acute disseminated encephalomyelitis              | 323.6x, 323.8x                                                                                                                                                                                                                           |
| Narcolepsy                                        | 347.xx, 89.17, 89.18, 307.4, 780.5                                                                                                                                                                                                       |
| Acute aseptic arthritis                           | 274.0x, 696.0x, 716.5x, 716.6x, 716.9x, 712.xx, 711.5x                                                                                                                                                                                   |
| (Idiopathic) Thrombocytopenia                     | 287.3x, 287.4x, 287.5, 279.12, 283.11, 284.1x, 446.6x, 776.1x                                                                                                                                                                            |
| Subacute thyroiditis                              | 245.1x                                                                                                                                                                                                                                   |
| <b>Cardiovascular system diseases</b>             |                                                                                                                                                                                                                                          |
| Microangiopathy                                   | 446.6x                                                                                                                                                                                                                                   |
| Heart failure                                     | 428.xx, 398.91, 402.01, 402.11, 402.91, 404.01, 404.03, 404.11, 404.13, 404.91, 404.93                                                                                                                                                   |
| Stress cardiomyopathy                             | 429.83                                                                                                                                                                                                                                   |
| Coronary artery disease                           | 410.xx-414.xx, V45.81, 36.0x, 36.1x                                                                                                                                                                                                      |
| Arrhythmia                                        | 427.xx, 426.xx, 624.x, 794.3x, 785.0x                                                                                                                                                                                                    |
| Myocarditis                                       | 422.xx, 429.0x, 420.9x, 423.9x                                                                                                                                                                                                           |
| <b>Circulatory system diseases</b>                |                                                                                                                                                                                                                                          |
| Thromboembolism                                   | 410.xx, 415.1x, 453.xx, 443.xx, 444.xx, 445.xx, 433.xx, 434.xx, 435.xx, 436.xx, 437.0x, 437.1x, 437.6x, 437.8x, 437.9x, 451.x, 452.x, 325.xx, 286.6x, 459.9x, 434.01, 557.0x, 557.9x, 453.40, 453.41, 453.42, 36.0x, 36.1x, 36.2x, 36.3x |
| Hemorrhagic disease                               | 286.5x, 286.7, 287.xx, 430.xx, 431.xx, 432.0x, 432.9x, 99.06                                                                                                                                                                             |
| Single Organ Cutaneous Vasculitis                 | 709.1x, 446.2x, 287.0x                                                                                                                                                                                                                   |
| <b>Hepato-renal system diseases</b>               |                                                                                                                                                                                                                                          |
| Acute liver injury                                | 570.xx, 573.3x                                                                                                                                                                                                                           |
| Acute kidney injury                               | 584.xx, 586.xx                                                                                                                                                                                                                           |
| Acute pancreatitis                                | 577.0x                                                                                                                                                                                                                                   |
| <b>Nerves and central nervous system diseases</b> |                                                                                                                                                                                                                                          |
| Generalized convulsion                            | 345.xx, 780.3x, 779.0x                                                                                                                                                                                                                   |
| Meningoencephalitis                               | 322.9x, 323.0x, 323.4x, 323.5x, 323.6x, 323.8x, 323.9x, 323.7x, 330.8x, 337.73, 046.3x, 049.8x, 036.1x, 056.01, 136.2x, 130.xx, 054.3x, 049.0x, 094.1x, 072.2x, 013.0x, 062.4x, 049.9x, 045.0x, 062.xx                                   |
| Transverse myelitis                               | 323.0x, 323.4x, 323.5x, 323.6x, 323.8x, 341.2x                                                                                                                                                                                           |
| Bell's Palsy                                      | 351.0x, 351.8x, 351.9x                                                                                                                                                                                                                   |
| <b>Respiratory system disease</b>                 |                                                                                                                                                                                                                                          |
| Acute respiratory distress syndrome               | 518.8x, 518.5x, 96.7x                                                                                                                                                                                                                    |
| <b>Skin, bone, and joints system diseases</b>     |                                                                                                                                                                                                                                          |
| Erythema multiforme                               | 695.1x                                                                                                                                                                                                                                   |
| Chilblain – like lesions                          | 991.5x                                                                                                                                                                                                                                   |
| <b>Other system diseases</b>                      |                                                                                                                                                                                                                                          |
| Anaphylaxis                                       | 995.0, 995.1, 995.3, 995.4, 999.4x 708.9, 519.11, 786.1, 458.9                                                                                                                                                                           |
| Anosmia, ageusia                                  | 781.1x                                                                                                                                                                                                                                   |
| Kawasaki disease                                  | 446.1x                                                                                                                                                                                                                                   |
| Rhabdomyolysis                                    | 728.88, 728.89, 791.3                                                                                                                                                                                                                    |
| <b>Acute diabetes complications</b>               |                                                                                                                                                                                                                                          |
| Hypoglycemia                                      | 250.80, 251.0x, 251.1x, 251.2x                                                                                                                                                                                                           |
| Hyperosmolar hyperglycemic syndrome               | 249.2x, 250.2x, 250.20, 250.22, 250.82                                                                                                                                                                                                   |
| Diabetic ketoacidosis                             | 249.1x, 250.10, 250.12, 250.30, 250.32, 250.1x                                                                                                                                                                                           |

**Supplementary Table 2. Characteristics of the patients receiving BNT162b2 and CoronaVac vaccination**

|                                                                   | <b>BNT162b2</b> | <b>CoronaVac</b> |
|-------------------------------------------------------------------|-----------------|------------------|
| <i>Pre-existing comorbidities</i>                                 |                 |                  |
| Hypertension (%)                                                  | 84382 (59.8)    | 135452 (64.6)    |
| Congestive Heart Failure (%)                                      | 1260 (0.9)      | 2403 (1.1)       |
| Vascular disease (%)                                              | 9338 (6.6)      | 14740 (7.0)      |
| Peripheral vascular disease (%)                                   | 378 (0.3)       | 566 (0.3)        |
| Cerebrovascular disease (%)                                       | 5944 (4.2)      | 11963 (5.7)      |
| Asthma (%)                                                        | 1798 (1.3)      | 2536 (1.2)       |
| Chronic obstructive pulmonary disease (%)                         | 2792 (2.0)      | 4694 (2.2)       |
| Dementia (%)                                                      | 145 (0.1)       | 603 (0.3)        |
| Paralysis (%)                                                     | 176 (0.1)       | 378 (0.2)        |
| Chronic renal failure (%)                                         | 2904 (2.1)      | 5088 (2.4)       |
| Mild liver disease (%)                                            | 272 (0.2)       | 366 (0.2)        |
| Moderate-severe liver disease (%)                                 | 155 (0.1)       | 245 (0.1)        |
| Ulcers (%)                                                        | 1413 (1.0)      | 2525 (1.2)       |
| Rheumatoid arthritis and other inflammatory polyarthropathies (%) | 269 (0.2)       | 364 (0.2)        |
| Malignancy (%)                                                    | 3314 (2.3)      | 4861 (2.3)       |
| Metastatic solid tumour (%)                                       | 371 (0.3)       | 512 (0.2)        |
| Acute respiratory infections (%)                                  | 3362 (2.4)      | 6104 (2.9)       |
| Viral infections (%)                                              | 259 (0.2)       | 412 (0.2)        |
| <i>Medication use within 90 days</i>                              |                 |                  |
| Renin-angiotensin-system agents (%)                               | 70110 (49.6)    | 108067 (51.5)    |
| Beta blockers (%)                                                 | 33816 (23.9)    | 53263 (25.4)     |
| Calcium channel blockers (%)                                      | 74197 (52.5)    | 119547 (57.0)    |
| Diuretics (%)                                                     | 9840 (7.0)      | 16092 (7.7)      |
| Nitrates (%)                                                      | 5828 (4.1)      | 9826 (4.7)       |
| Lipid lowering agents (%)                                         | 98136 (69.5)    | 149056 (71.1)    |
| Insulins (%)                                                      | 13118 (9.3)     | 18536 (8.8)      |
| Antidiabetic drugs (%)                                            | 103859 (73.5)   | 154996 (73.9)    |
| Antiarrhythmic drugs (%)                                          | 241 (0.2)       | 344 (0.2)        |
| Cardiac glycosides (%)                                            | 582 (0.4)       | 1108 (0.5)       |
| Oral anticoagulants (%)                                           | 1994 (1.4)      | 3665 (1.7)       |
| Parenteral anticoagulants (%)                                     | 427 (0.3)       | 395 (0.2)        |
| Antiplatelets (%)                                                 | 23959 (17.0)    | 39555 (18.9)     |
| Antifibrinolytics and hemostatics (%)                             | 537 (0.4)       | 594 (0.3)        |
| Hormonal agents (contraceptives, HRT, SERM) (%)                   | 1512 (1.1)      | 1850 (0.9)       |
| Glucocorticoids (%)                                               | 1812 (1.3)      | 2040 (1.0)       |
| Antidepressants (%)                                               | 7143 (5.1)      | 10354 (4.9)      |
| Bevacizumab (%)                                                   | 12 (0.0)        | 19 (0.0)         |
| Tranexamic acid (%)                                               | 531 (0.4)       | 589 (0.3)        |
| Antiepileptic drugs (%)                                           | 3047 (2.2)      | 4273 (2.0)       |

**Supplementary Table 3. Adjusted incidence rate ratio and risk difference of adverse event of special interest and acute diabetes complications for 14-day follow-up period after vaccination of BNT162b2 and CoronaVac**

|                                                                 | Reference |       | First dose            |                                                         | Second dose |                       |                                                         |
|-----------------------------------------------------------------|-----------|-------|-----------------------|---------------------------------------------------------|-------------|-----------------------|---------------------------------------------------------|
|                                                                 | Event     | Event | Adjusted IRR (95% CI) | Risk difference (95% CI), incidence per 100,000 persons | Event       | Adjusted IRR (95% CI) | Risk difference (95% CI), incidence per 100,000 persons |
| <b><i>BNT162b2</i></b>                                          |           |       |                       |                                                         |             |                       |                                                         |
| <b>Overall adverse event of special interest</b>                | 4404      | 34    | 0.80 (0.56,1.15)      | -19.33 (-77.39,12.78)                                   | 39          | 1.04 (0.74,1.45)      | 2.74 (-34.57,30.60)                                     |
| <b>Autoimmune disease</b>                                       | 955       | 15    | 0.96 (0.57,1.61)      | -0.89 (-21.46,10.65)                                    | 10          | 0.70 (0.37,1.34)      | -8.10 (-48.46,7.14)                                     |
| Narcolepsy                                                      | 636       | 11    | 0.81 (0.44,1.49)      | -3.59 (-29.86,7.63)                                     | 9           | 0.71 (0.36,1.39)      | -6.27 (-41.65,6.52)                                     |
| Acute aseptic arthritis                                         | 306       | 4     | 2.00 (0.70,5.75)      | 2.15 (-4.06,7.71)                                       | 2           | 1.25 (0.25,6.14)      | 0.86 (-27.36,7.82)                                      |
| <b>Cardiovascular diseases</b>                                  | 3483      | 17    | 0.77 (0.46,1.29)      | -9.81 (-52.41,9.99)                                     | 23          | 1.15 (0.74,1.78)      | 4.20 (-15.73,19.55)                                     |
| Heart failure                                                   | 1642      | 3     | 0.65 (0.20,2.13)      | -3.85 (-53.27,7.04)                                     | 7           | 1.41 (0.64,3.12)      | 2.09 (-7.61,9.01)                                       |
| Coronary artery disease                                         | 1960      | 8     | 0.61 (0.30,1.23)      | -12.20 (-65.26,5.19)                                    | 16          | 1.35 (0.79,2.29)      | 4.85 (-7.51,15.85)                                      |
| Arrhythmia                                                      | 1616      | 14    | 1.17 (0.65,2.11)      | 2.02 (-11.94,11.51)                                     | 5           | 0.52 (0.21,1.29)      | -13.14 (-84.22,4.95)                                    |
| <b>Circulatory system</b>                                       | 3280      | 18    | 0.81 (0.49,1.34)      | -7.50 (-45.70,11.22)                                    | 22          | 1.10 (0.70,1.73)      | 2.96 (-18.61,18.47)                                     |
| Thromboembolism                                                 | 3069      | 16    | 0.76 (0.44,1.30)      | -9.69 (-52.23,9.51)                                     | 22          | 1.17 (0.75,1.84)      | 4.45 (-14.12,19.00)                                     |
| Haemorrhagic disease                                            | 450       | 2     | 0.86 (0.20,3.69)      | -0.59 (-34.12,6.28)                                     | 3           | 1.89 (0.55,6.45)      | 1.74 (-6.98,7.28)                                       |
| <b>Nerves and central nervous system</b>                        | 415       | 3     | 1.12 (0.33,3.81)      | 0.62 (-23.71,8.53)                                      | 5           | 1.95 (0.68,5.64)      | 2.86 (-5.57,9.52)                                       |
| Generalized convulsion                                          | 247       | 1     | 0.68 (0.09,5.44)      | -1.35 (-79.36,6.07)                                     | 3           | 2.23 (0.51,9.81)      | 1.60 (-7.21,6.68)                                       |
| <b>Respiratory system (Acute respiratory distress syndrome)</b> | 1111      | 4     | 0.54 (0.20,1.41)      | -4.32 (-40.22,3.03)                                     | 3           | 0.43 (0.13,1.40)      | -6.78 (-69.84,2.99)                                     |
| <b>Acute diabetes complications</b>                             | 2604      | 7     | 0.36 (0.16,0.81)      | -33.19 (-142.92,-2.87)                                  | 19          | 1.22 (0.73,2.05)      | 3.44 (-10.35,14.21)                                     |
| Hypoglycemia                                                    | 1924      | 5     | 0.39 (0.14,1.08)      | -23.19 (-137.33,1.71)                                   | 16          | 1.67 (0.93,3.00)      | 6.05 (-1.73,15.37)                                      |
| Hyperosmolar hyperglycemic syndrome                             | 961       | 3     | 0.44 (0.13,1.51)      | -5.42 (-62.90,3.17)                                     | 3           | 0.45 (0.11,1.81)      | -5.36 (-76.23,4.21)                                     |
| <b><i>CoronaVac</i></b>                                         |           |       |                       |                                                         |             |                       |                                                         |
| <b>Overall adverse event of special interest</b>                | 4847      | 50    | 0.73 (0.54,0.99)      | -23.05 (-66.29,-0.48)                                   | 34          | 0.65 (0.46,0.93)      | -33.08 (-91.36,-3.64)                                   |
| <b>Autoimmune disease</b>                                       | 1003      | 12    | 0.69 (0.38,1.27)      | -4.95 (-27.71,3.54)                                     | 10          | 0.61 (0.32,1.15)      | -7.18 (-35.82,2.25)                                     |
| Narcolepsy                                                      | 659       | 8     | 0.54 (0.26,1.12)      | -5.91 (-32.93,1.22)                                     | 6           | 0.44 (0.19,0.99)      | -8.88 (-48.49,-0.02)                                    |
| Acute aseptic arthritis                                         | 325       | 4     | 2.45 (0.77,7.82)      | 2.00 (-2.07,6.06)                                       | 3           | 1.84 (0.49,6.88)      | 1.54 (-7.12,5.94)                                       |
| <b>Cardiovascular diseases</b>                                  | 3801      | 40    | 0.89 (0.62,1.27)      | -4.51 (-28.01,9.73)                                     | 23          | 0.71 (0.46,1.09)      | -14.65 (-53.45,3.77)                                    |
| Heart failure                                                   | 1767      | 10    | 0.61 (0.30,1.22)      | -5.03 (-29.31,2.33)                                     | 6           | 0.68 (0.27,1.68)      | -3.72 (-33.76,5.13)                                     |
| Coronary artery disease                                         | 2083      | 15    | 0.70 (0.39,1.23)      | -5.81 (-30.27,3.69)                                     | 10          | 0.52 (0.26,1.01)      | -12.47 (-54.88,0.23)                                    |
| Arrhythmia                                                      | 1805      | 27    | 1.24 (0.77,2.00)      | 3.74 (-7.65,13.09)                                      | 11          | 0.75 (0.39,1.42)      | -6.47 (-40.39,7.72)                                     |
| <b>Circulatory system</b>                                       | 3592      | 24    | 0.68 (0.44,1.05)      | -10.93 (-39.97,1.56)                                    | 18          | 0.60 (0.37,0.99)      | -15.33 (-54.16,-0.17)                                   |
| Thromboembolism                                                 | 3374      | 24    | 0.71 (0.46,1.09)      | -9.41 (-36.46,2.58)                                     | 17          | 0.60 (0.36,1.00)      | -14.96 (-54.38,0.15)                                    |
| Haemorrhagic disease                                            | 465       | 5     | 1.37 (0.49,3.82)      | 0.95 (-7.59,5.37)                                       | 2           | 0.48 (0.13,1.79)      | -3.85 (-49.49,3.20)                                     |
| <b>Hepato-renal system</b>                                      | 932       | 5     | 0.52 (0.18,1.50)      | -2.99 (-32.13,2.32)                                     | 1           | 0.17 (0.02,1.25)      | -15.27 (-283.00,1.39)                                   |
| <b>Nerves and central nervous system</b>                        | 483       | 6     | 0.93 (0.38,2.24)      | -0.40 (-14.65,5.02)                                     | 4           | 0.69 (0.24,1.99)      | -2.26 (-29.30,4.52)                                     |
| Bell's Palsy                                                    | 207       | 6     | 1.31 (0.53,3.29)      | 1.15 (-8.00,6.17)                                       | 4           | 1.10 (0.37,3.29)      | 0.42 (-15.41,6.17)                                      |
| <b>Respiratory system (Acute respiratory distress syndrome)</b> | 1142      | 4     | 0.46 (0.17,1.22)      | -5.13 (-39.46,1.48)                                     | 5           | 0.64 (0.27,1.53)      | -2.46 (-22.64,2.85)                                     |
| <b>Acute diabetes complications</b>                             | 2885      | 24    | 0.87 (0.54,1.39)      | -2.96 (-22.47,7.40)                                     | 15          | 0.76 (0.45,1.30)      | -6.02 (-32.45,5.99)                                     |
| Hypoglycemia                                                    | 2149      | 18    | 0.85 (0.48,1.50)      | -2.22 (-19.93,6.18)                                     | 8           | 0.56 (0.28,1.14)      | -9.75 (-47.76,2.28)                                     |
| Hyperosmolar hyperglycemic syndrome                             | 1059      | 10    | 1.25 (0.63,2.48)      | 1.55 (-7.34,7.50)                                       | 6           | 0.90 (0.37,2.16)      | -0.87 (-20.98,6.74)                                     |

Notes: IRR = Incidence rate ratio; CI = confidence interval. Adjusted IRR was obtained from conditional Poisson regression adjusted for seasonal effect from self-controlled case series analysis.

**Supplementary Table 4. Adjusted incidence rate ratio and risk difference of adverse event of special interest and acute diabetes complications for 28-day follow-up period after vaccination of BNT162b2 and CoronaVac**

|                                                                 | Reference |       | First dose            |                                                         | Second dose |                       |                                                         |
|-----------------------------------------------------------------|-----------|-------|-----------------------|---------------------------------------------------------|-------------|-----------------------|---------------------------------------------------------|
|                                                                 | Event     | Event | Adjusted IRR (95% CI) | Risk difference (95% CI), incidence per 100,000 persons | Event       | Adjusted IRR (95% CI) | Risk difference (95% CI), incidence per 100,000 persons |
| <b>BNT162b2</b>                                                 |           |       |                       |                                                         |             |                       |                                                         |
| <b>Overall adverse event of special interest</b>                | 4335      | 60    | 0.91 (0.68,1.20)      | -15.99 (-83.45,29.91)                                   | 82          | 1.13 (0.88,1.45)      | 17.51 (-23.94,55.45)                                    |
| <b>Autoimmune disease</b>                                       | 931       | 27    | 1.07 (0.71,1.63)      | 2.53 (-20.37,18.99)                                     | 22          | 0.77 (0.48,1.24)      | -11.18 (-53.70,9.43)                                    |
| Narcolepsy                                                      | 616       | 21    | 0.94 (0.59,1.52)      | -1.76 (-28.84,14.01)                                    | 19          | 0.73 (0.44,1.21)      | -11.14 (-52.10,7.09)                                    |
| Acute aseptic arthritis                                         | 302       | 6     | 2.03 (0.80,5.13)      | 3.62 (-3.24,10.58)                                      | 4           | 1.33 (0.38,4.70)      | 1.77 (-21.89,10.35)                                     |
| <b>Cardiovascular diseases</b>                                  | 3443      | 31    | 0.91 (0.61,1.34)      | -6.72 (-51.25,20.69)                                    | 49          | 1.28 (0.93,1.76)      | 14.48 (-5.70,35.31)                                     |
| Heart failure                                                   | 1634      | 6     | 0.80 (0.33,1.91)      | -3.33 (-41.54,9.81)                                     | 12          | 1.20 (0.62,2.29)      | 2.12 (-12.41,11.58)                                     |
| Coronary artery disease                                         | 1938      | 15    | 0.73 (0.42,1.25)      | -13.64 (-66.37,9.74)                                    | 31          | 1.35 (0.91,2.02)      | 9.44 (-4.90,24.33)                                      |
| Arrhythmia                                                      | 1595      | 23    | 1.22 (0.76,1.95)      | 5.32 (-12.42,19.57)                                     | 17          | 0.93 (0.54,1.60)      | -2.12 (-33.84,15.14)                                    |
| <b>Circulatory system</b>                                       | 3242      | 34    | 1.02 (0.70,1.49)      | 1.27 (-33.76,25.80)                                     | 44          | 1.13 (0.81,1.59)      | 7.46 (-18.71,29.25)                                     |
| Thromboembolism                                                 | 3034      | 30    | 0.95 (0.64,1.43)      | -2.85 (-41.81,21.96)                                    | 43          | 1.18 (0.84,1.66)      | 8.87 (-14.44,29.30)                                     |
| Haemorrhagic disease                                            | 445       | 6     | 1.62 (0.72,3.64)      | 2.83 (-5.17,9.85)                                       | 4           | 1.24 (0.43,3.59)      | 1.41 (-18.37,9.81)                                      |
| <b>Hepato-renal system</b>                                      | 867       | 3     | 0.43 (0.13,1.38)      | -7.44 (-74.83,3.11)                                     | 4           | 0.59 (0.22,1.64)      | -3.77 (-41.51,4.44)                                     |
| <b>Nerves and central nervous system</b>                        | 409       | 4     | 1.05 (0.36,3.04)      | 0.49 (-30.33,11.58)                                     | 10          | 2.40 (1.09,5.27)      | 5.99 (0.46,13.97)                                       |
| Generalized convulsion                                          | 243       | 2     | 1.12 (0.24,5.21)      | 0.64 (-35.65,9.24)                                      | 6           | 3.10 (1.00,9.59)      | 3.93 (0.01,10.25)                                       |
| Bell's Palsy                                                    | 156       | 2     | 1.13 (0.26,4.83)      | 0.40 (-23.46,6.62)                                      | 3           | 1.43 (0.38,5.39)      | 1.07 (-13.72,6.80)                                      |
| <b>Respiratory system (Acute respiratory distress syndrome)</b> | 1104      | 5     | 0.37 (0.16,0.90)      | -16.81 (-91.76,-0.60)                                   | 9           | 0.63 (0.30,1.31)      | -5.99 (-39.37,3.99)                                     |
| <b>Acute diabetes complications</b>                             | 2581      | 17    | 0.55 (0.31,0.99)      | -28.79 (-104.93,-0.32)                                  | 32          | 1.08 (0.70,1.64)      | 2.52 (-19.87,18.50)                                     |
| Hypoglycemia                                                    | 1908      | 12    | 0.62 (0.30,1.30)      | -16.15 (-86.09,8.36)                                    | 25          | 1.35 (0.81,2.25)      | 6.88 (-8.54,20.32)                                      |
| Hyperosmolar hyperglycemic syndrome                             | 955       | 6     | 0.55 (0.22,1.38)      | -7.17 (-54.63,4.14)                                     | 6           | 0.54 (0.22,1.29)      | -7.39 (-52.13,3.41)                                     |
| <b>CoronaVac</b>                                                |           |       |                       |                                                         |             |                       |                                                         |
| <b>Overall adverse event of special interest</b>                | 4735      | 107   | 0.81 (0.65,1.02)      | -33.35 (-90.77,3.38)                                    | 89          | 0.87 (0.69,1.11)      | -21.23 (-75.99,16.18)                                   |
| <b>Autoimmune disease</b>                                       | 973       | 23    | 0.64 (0.40,1.03)      | -14.61 (-51.37,0.96)                                    | 29          | 0.94 (0.62,1.41)      | -1.72 (-20.66,10.01)                                    |
| Narcolepsy                                                      | 632       | 17    | 0.56 (0.33,0.97)      | -15.73 (-56.62,-0.44)                                   | 24          | 0.98 (0.63,1.53)      | -0.37 (-16.24,9.60)                                     |
| Acute aseptic arthritis                                         | 322       | 6     | 1.74 (0.62,4.85)      | 2.05 (-5.32,7.03)                                       | 4           | 1.18 (0.40,3.46)      | 0.73 (-13.24,6.30)                                      |
| <b>Cardiovascular diseases</b>                                  | 3740      | 68    | 0.77 (0.56,1.04)      | -21.24 (-64.06,3.22)                                    | 56          | 0.88 (0.65,1.19)      | -9.36 (-43.99,13.19)                                    |
| Heart failure                                                   | 1747      | 21    | 0.64 (0.34,1.20)      | -9.84 (-46.73,4.06)                                     | 15          | 0.87 (0.50,1.53)      | -2.57 (-24.51,8.41)                                     |
| Coronary artery disease                                         | 2054      | 26    | 0.59 (0.37,0.93)      | -20.32 (-63.97,-1.65)                                   | 28          | 0.78 (0.51,1.19)      | -8.30 (-36.84,6.10)                                     |
| Arrhythmia                                                      | 1781      | 40    | 0.91 (0.59,1.41)      | -2.98 (-27.88,11.70)                                    | 22          | 0.73 (0.46,1.17)      | -11.27 (-46.80,5.85)                                    |
| <b>Circulatory system</b>                                       | 3533      | 50    | 0.71 (0.52,0.99)      | -22.66 (-64.20,-0.67)                                   | 51          | 0.88 (0.64,1.21)      | -7.75 (-38.47,11.76)                                    |
| Thromboembolism                                                 | 3319      | 50    | 0.73 (0.53,1.02)      | -19.24 (-57.60,1.11)                                    | 46          | 0.82 (0.59,1.15)      | -11.26 (-44.56,8.38)                                    |
| Haemorrhagic disease                                            | 458       | 7     | 1.01 (0.41,2.50)      | 0.08 (-17.12,7.12)                                      | 7           | 1.00 (0.36,2.73)      | -0.01 (-20.65,7.52)                                     |
| <b>Hepato-renal system</b>                                      | 921       | 12    | 0.70 (0.36,1.35)      | -3.97 (-25.90,3.74)                                     | 5           | 0.41 (0.16,1.05)      | -13.07 (-76.67,0.73)                                    |
| Acute kidney injury                                             | 712       | 7     | 0.83 (0.35,1.97)      | -0.85 (-14.88,3.88)                                     | 1           | 0.17 (0.02,1.18)      | -20.25 (-333.14,1.20)                                   |
| Acute pancreatitis                                              | 218       | 3     | 0.68 (0.20,2.30)      | -1.84 (-30.55,4.28)                                     | 5           | 1.05 (0.37,2.99)      | 0.20 (-12.76,5.03)                                      |
| <b>Nerves and central nervous system</b>                        | 475       | 10    | 0.68 (0.34,1.39)      | -4.10 (-27.62,3.94)                                     | 8           | 0.65 (0.30,1.41)      | -4.80 (-32.86,4.07)                                     |
| Bell's Palsy                                                    | 199       | 9     | 1.01 (0.47,2.18)      | 0.06 (-15.75,7.42)                                      | 9           | 1.34 (0.62,2.92)      | 2.22 (-8.49,9.02)                                       |
| <b>Respiratory system (Acute respiratory distress syndrome)</b> | 1129      | 6     | 0.32 (0.13,0.79)      | -23.03 (-111.17,-1.78)                                  | 16          | 1.11 (0.64,1.93)      | 1.04 (-9.24,7.77)                                       |
| <b>Acute diabetes complications</b>                             | 2851      | 46    | 0.83 (0.58,1.21)      | -7.16 (-33.18,7.71)                                     | 27          | 0.64 (0.42,0.97)      | -20.54 (-62.69,-0.98)                                   |
| Hypoglycemia                                                    | 2122      | 34    | 0.86 (0.56,1.34)      | -4.02 (-26.71,8.57)                                     | 19          | 0.65 (0.39,1.08)      | -13.99 (-52.81,2.43)                                    |
| Hyperosmolar hyperglycemic syndrome                             | 1047      | 18    | 1.07 (0.61,1.87)      | 0.89 (-12.30,9.08)                                      | 10          | 0.70 (0.36,1.37)      | -5.83 (-35.13,5.23)                                     |

Notes: IRR = Incidence rate ratio; CI = confidence interval. Adjusted IRR was obtained from conditional Poisson regression adjusted for seasonal effect from self-controlled case series analysis.



**Supplementary Table 5. Adjusted incidence rate ratio and risk difference of adverse event of special interest and acute diabetes complications for 49-day follow-up period after vaccination of BNT162b2 and CoronaVac**

|                                                                 | Reference |       | First dose            |                                                         | Second dose |                       |                                                         |
|-----------------------------------------------------------------|-----------|-------|-----------------------|---------------------------------------------------------|-------------|-----------------------|---------------------------------------------------------|
|                                                                 | Event     | Event | Adjusted IRR (95% CI) | Risk difference (95% CI), incidence per 100,000 persons | Event       | Adjusted IRR (95% CI) | Risk difference (95% CI), incidence per 100,000 persons |
| <b>BNT162b2</b>                                                 |           |       |                       |                                                         |             |                       |                                                         |
| <b>Overall adverse event of special interest</b>                | 4276      | 68    | 0.94 (0.72,1.21)      | -14.45 (-94.62,43.67)                                   | 133         | 1.06 (0.85,1.31)      | 11.26 (-43.39,58.37)                                    |
| <b>Autoimmune disease</b>                                       | 906       | 29    | 1.20 (0.80,1.81)      | 9.45 (-17.78,31.58)                                     | 45          | 0.97 (0.67,1.40)      | -1.75 (-34.21,20.06)                                    |
| Narcolepsy                                                      | 593       | 23    | 1.10 (0.69,1.74)      | 4.11 (-27.15,25.68)                                     | 40          | 0.95 (0.64,1.41)      | -2.35 (-33.56,17.62)                                    |
| Acute aseptic arthritis                                         | 300       | 6     | 2.00 (0.78,5.16)      | 4.29 (-4.32,12.08)                                      | 6           | 1.16 (0.43,3.10)      | 1.16 (-19.75,10.14)                                     |
| <b>Cardiovascular diseases</b>                                  | 3420      | 32    | 0.77 (0.53,1.12)      | -24.85 (-89.60,10.92)                                   | 71          | 1.00 (0.75,1.33)      | -0.07 (-34.55,25.72)                                    |
| Heart failure                                                   | 1629      | 6     | 0.59 (0.24,1.45)      | -11.77 (-80.42,7.70)                                    | 17          | 0.89 (0.48,1.68)      | -1.96 (-27.51,10.11)                                    |
| Coronary artery disease                                         | 1922      | 15    | 0.60 (0.36,1.03)      | -31.87 (-112.90,1.61)                                   | 47          | 1.14 (0.80,1.62)      | 5.96 (-15.52,23.92)                                     |
| Arrhythmia                                                      | 1578      | 24    | 1.17 (0.74,1.84)      | 6.11 (-18.74,24.87)                                     | 33          | 1.11 (0.72,1.70)      | 4.05 (-21.21,22.47)                                     |
| <b>Circulatory system</b>                                       | 3218      | 36    | 0.91 (0.64,1.30)      | -7.88 (-55.74,22.92)                                    | 66          | 0.93 (0.68,1.26)      | -6.30 (-46.32,20.80)                                    |
| Thromboembolism                                                 | 3011      | 32    | 0.87 (0.60,1.27)      | -11.54 (-63.28,19.69)                                   | 64          | 0.96 (0.70,1.31)      | -3.37 (-40.00,22.15)                                    |
| Haemorrhagic disease                                            | 444       | 6     | 1.11 (0.52,2.37)      | 0.80 (-13.45,8.39)                                      | 5           | 0.80 (0.29,2.17)      | -2.09 (-35.39,7.84)                                     |
| <b>Hepato-renal system</b>                                      | 860       | 5     | 0.64 (0.27,1.53)      | -6.25 (-50.88,6.40)                                     | 9           | 0.77 (0.35,1.71)      | -3.21 (-34.25,7.69)                                     |
| <b>Nerves and central nervous system</b>                        | 405       | 5     | 1.13 (0.43,2.94)      | 1.50 (-27.28,13.77)                                     | 13          | 1.86 (0.89,3.87)      | 6.11 (-2.47,15.49)                                      |
| Generalized convulsion                                          | 241       | 2     | 0.98 (0.20,4.75)      | -0.11 (-52.08,10.54)                                    | 8           | 2.90 (0.93,9.08)      | 4.76 (-1.03,11.88)                                      |
| <b>Respiratory system (Acute respiratory distress syndrome)</b> | 1090      | 7     | 0.52 (0.25,1.07)      | -18.75 (-87.29,1.96)                                    | 21          | 0.93 (0.54,1.61)      | -1.41 (-24.37,10.96)                                    |
| <b>Acute diabetes complications</b>                             | 2562      | 18    | 0.58 (0.33,1.02)      | -36.24 (-129.06,1.16)                                   | 50          | 1.04 (0.71,1.52)      | 1.82 (-25.54,21.37)                                     |
| Hypoglycemia                                                    | 1894      | 12    | 0.64 (0.30,1.34)      | -20.78 (-109.85,12.09)                                  | 39          | 1.39 (0.88,2.20)      | 10.25 (-6.73,26.24)                                     |
| Hyperosmolar hyperglycemic syndrome                             | 949       | 7     | 0.63 (0.26,1.48)      | -7.76 (-56.95,6.62)                                     | 11          | 0.57 (0.28,1.16)      | -9.61 (-51.51,2.80)                                     |
| <b>CoronaVac</b>                                                |           |       |                       |                                                         |             |                       |                                                         |
| <b>Overall adverse event of special interest</b>                | 4661      | 121   | 0.76 (0.61,0.94)      | -62.73 (-141.47,-10.64)                                 | 149         | 0.81 (0.66,0.99)      | -47.77 (-115.37,-2.66)                                  |
| <b>Autoimmune disease</b>                                       | 946       | 26    | 0.71 (0.46,1.11)      | -16.07 (-58.81,4.89)                                    | 53          | 1.05 (0.75,1.47)      | 1.89 (-16.48,15.82)                                     |
| Narcolepsy                                                      | 610       | 20    | 0.66 (0.40,1.08)      | -16.21 (-60.03,3.12)                                    | 43          | 1.07 (0.74,1.54)      | 1.99 (-14.01,14.03)                                     |
| Acute aseptic arthritis                                         | 318       | 6     | 1.87 (0.66,5.27)      | 3.14 (-5.76,9.17)                                       | 8           | 1.66 (0.60,4.56)      | 2.67 (-7.52,8.84)                                       |
| <b>Cardiovascular diseases</b>                                  | 3694      | 78    | 0.75 (0.56,0.99)      | -32.56 (-87.36,-0.50)                                   | 92          | 0.81 (0.63,1.04)      | -22.94 (-66.39,4.19)                                    |
| Heart failure                                                   | 1733      | 23    | 0.65 (0.35,1.21)      | -13.19 (-60.07,5.55)                                    | 27          | 0.98 (0.62,1.55)      | -0.46 (-19.71,11.46)                                    |
| Coronary artery disease                                         | 2029      | 27    | 0.50 (0.32,0.78)      | -41.69 (-109.93,-9.32)                                  | 52          | 0.84 (0.60,1.18)      | -8.13 (-35.39,7.88)                                     |
| Arrhythmia                                                      | 1762      | 48    | 0.94 (0.63,1.41)      | -2.53 (-30.02,14.77)                                    | 33          | 0.60 (0.39,0.91)      | -27.65 (-79.35,-3.17)                                   |
| <b>Circulatory system</b>                                       | 3491      | 56    | 0.65 (0.48,0.88)      | -42.80 (-101.79,-8.96)                                  | 87          | 0.84 (0.65,1.09)      | -15.47 (-51.74,7.59)                                    |
| Thromboembolism                                                 | 3280      | 56    | 0.67 (0.49,0.91)      | -37.24 (-91.98,-6.31)                                   | 79          | 0.79 (0.60,1.03)      | -20.04 (-58.75,2.97)                                    |
| Haemorrhagic disease                                            | 454       | 7     | 0.76 (0.31,1.82)      | -2.91 (-31.31,6.49)                                     | 11          | 0.94 (0.40,2.19)      | -0.63 (-21.57,7.80)                                     |
| <b>Hepato-renal system</b>                                      | 912       | 13    | 0.60 (0.30,1.18)      | -9.26 (-46.49,3.12)                                     | 13          | 0.60 (0.32,1.12)      | -9.40 (-43.76,2.18)                                     |
| Acute kidney injury                                             | 707       | 8     | 0.73 (0.31,1.73)      | -2.36 (-24.68,4.71)                                     | 5           | 0.44 (0.17,1.16)      | -8.27 (-55.28,1.52)                                     |
| Acute pancreatitis                                              | 216       | 3     | 0.57 (0.16,1.97)      | -3.67 (-45.21,4.33)                                     | 7           | 0.81 (0.34,1.92)      | -1.15 (-17.22,4.23)                                     |
| <b>Nerves and central nervous system</b>                        | 461       | 13    | 0.88 (0.47,1.64)      | -2.10 (-24.67,8.71)                                     | 19          | 1.00 (0.57,1.75)      | 0.01 (-16.68,9.56)                                      |
| Bell's Palsy                                                    | 191       | 11    | 1.11 (0.55,2.23)      | 1.27 (-14.76,10.14)                                     | 15          | 1.40 (0.71,2.79)      | 3.61 (-7.62,11.78)                                      |
| <b>Respiratory system (Acute respiratory distress syndrome)</b> | 1122      | 7     | 0.28 (0.12,0.65)      | -35.81 (-145.99,-4.99)                                  | 22          | 0.78 (0.46,1.31)      | -4.01 (-23.64,4.82)                                     |
| <b>Acute diabetes complications</b>                             | 2825      | 47    | 0.74 (0.51,1.08)      | -16.77 (-56.66,4.49)                                    | 52          | 0.72 (0.52,0.99)      | -18.82 (-54.12,-0.20)                                   |
| Hypoglycemia                                                    | 2098      | 35    | 0.88 (0.57,1.36)      | -5.16 (-35.81,12.46)                                    | 42          | 0.92 (0.63,1.34)      | -3.31 (-27.71,11.97)                                    |
| Hyperosmolar hyperglycemic syndrome                             | 1040      | 19    | 0.86 (0.49,1.50)      | -2.72 (-24.01,7.84)                                     | 16          | 0.61 (0.36,1.04)      | -10.74 (-42.16,1.01)                                    |

Notes: IRR = Incidence rate ratio; CI = confidence interval. Adjusted IRR was obtained from conditional Poisson regression adjusted for seasonal effect from self-controlled case series analysis.

**Supplementary Table 6. Adjusted incidence rate ratio and risk difference of adverse event of special interest and acute diabetes complications after vaccination of BNT162b2 and CoronaVac after excluding the patients infected by COVID-19 before or during the study period**

|                                                                 | Reference |       | First dose            |                                                         | Second dose |                       |                                                         |
|-----------------------------------------------------------------|-----------|-------|-----------------------|---------------------------------------------------------|-------------|-----------------------|---------------------------------------------------------|
|                                                                 | Event     | Event | Adjusted IRR (95% CI) | Risk difference (95% CI), incidence per 100,000 persons | Event       | Adjusted IRR (95% CI) | Risk difference (95% CI), incidence per 100,000 persons |
| <b>BNT162b2</b>                                                 |           |       |                       |                                                         |             |                       |                                                         |
| <b>Overall adverse event of special interest</b>                | 4366      | 52    | 0.81 (0.60,1.11)      | -26.52 (-94.03,13.60)                                   | 56          | 0.99 (0.74,1.32)      | -1.25 (-48.74,33.93)                                    |
| <b>Autoimmune disease</b>                                       | 941       | 26    | 1.10 (0.72,1.68)      | 2.65 (-15.97,16.44)                                     | 13          | 0.58 (0.33,1.05)      | -21.20 (-84.10,1.81)                                    |
| Narcolepsy                                                      | 623       | 21    | 1.02 (0.63,1.64)      | 0.51 (-20.10,13.65)                                     | 12          | 0.60 (0.33,1.11)      | -16.27 (-70.73,3.34)                                    |
| Acute aseptic arthritis                                         | 305       | 5     | 1.61 (0.59,4.38)      | 1.89 (-7.23,7.98)                                       | 2           | 0.77 (0.15,3.92)      | -1.47 (-57.54,7.71)                                     |
| <b>Cardiovascular diseases</b>                                  | 3462      | 24    | 0.72 (0.45,1.14)      | -19.58 (-77.98,7.91)                                    | 36          | 1.22 (0.85,1.75)      | 8.97 (-11.09,27.33)                                     |
| Heart failure                                                   | 1637      | 6     | 0.86 (0.35,2.11)      | -1.73 (-32.80,9.41)                                     | 9           | 1.18 (0.57,2.43)      | 1.65 (-13.47,10.56)                                     |
| Coronary artery disease                                         | 1948      | 10    | 0.47 (0.24,0.93)      | -29.16 (-116.51,-1.31)                                  | 23          | 1.30 (0.82,2.06)      | 6.00 (-8.18,18.88)                                      |
| Arrhythmia                                                      | 1599      | 20    | 1.15 (0.68,1.96)      | 3.10 (-16.12,16.40)                                     | 12          | 0.87 (0.47,1.61)      | -3.61 (-37.97,12.65)                                    |
| <b>Circulatory system</b>                                       | 3254      | 29    | 0.92 (0.61,1.38)      | -4.72 (-42.60,18.13)                                    | 34          | 1.16 (0.80,1.69)      | 7.07 (-16.41,26.57)                                     |
| Thromboembolism                                                 | 3047      | 25    | 0.82 (0.53,1.28)      | -10.08 (-54.23,13.33)                                   | 33          | 1.19 (0.82,1.75)      | 7.60 (-13.42,25.72)                                     |
| Haemorrhagic disease                                            | 443       | 6     | 2.01 (0.87,4.61)      | 3.72 (-1.95,10.68)                                      | 4           | 1.71 (0.59,4.94)      | 3.07 (-9.55,10.88)                                      |
| <b>Hepato-renal system</b>                                      | 869       | 2     | 0.32 (0.08,1.31)      | -8.24 (-106.08,2.20)                                    | 3           | 0.61 (0.18,2.01)      | -2.54 (-40.83,4.64)                                     |
| <b>Nerves and central nervous system</b>                        | 412       | 4     | 0.95 (0.31,2.89)      | -0.36 (-29.57,8.87)                                     | 6           | 1.55 (0.57,4.25)      | 2.61 (-10.41,10.36)                                     |
| Generalized convulsion                                          | 245       | 2     | 0.84 (0.17,4.18)      | -0.69 (-41.70,6.47)                                     | 3           | 1.36 (0.29,6.45)      | 0.97 (-20.96,7.18)                                      |
| <b>Respiratory system (Acute respiratory distress syndrome)</b> | 1104      | 4     | 0.32 (0.12,0.85)      | -13.53 (-87.22,-0.53)                                   | 5           | 0.45 (0.17,1.20)      | -7.78 (-58.82,2.01)                                     |
| <b>Acute diabetes complications</b>                             | 2591      | 12    | 0.39 (0.20,0.75)      | -40.60 (-143.89,-5.82)                                  | 23          | 0.94 (0.56,1.58)      | -1.60 (-28.09,13.12)                                    |
| Hypoglycemia                                                    | 1917      | 8     | 0.39 (0.17,0.93)      | -29.87 (-141.22,-0.94)                                  | 19          | 1.26 (0.69,2.31)      | 4.01 (-12.86,16.04)                                     |
| Hyperosmolar hyperglycemic syndrome                             | 955       | 5     | 0.46 (0.15,1.37)      | -7.67 (-67.90,3.30)                                     | 4           | 0.43 (0.14,1.37)      | -8.52 (-78.06,3.34)                                     |
| <b>CoronaVac</b>                                                |           |       |                       |                                                         |             |                       |                                                         |
| <b>Overall adverse event of special interest</b>                | 4789      | 79    | 0.77 (0.59,1.00)      | -30.64 (-83.39,0.17)                                    | 60          | 0.77 (0.58,1.02)      | -30.74 (-86.81,1.96)                                    |
| <b>Autoimmune disease</b>                                       | 987       | 18    | 0.68 (0.40,1.15)      | -9.11 (-39.69,3.50)                                     | 20          | 0.84 (0.52,1.34)      | -3.69 (-23.88,6.70)                                     |
| Narcolepsy                                                      | 646       | 12    | 0.51 (0.27,0.98)      | -12.67 (-52.97,-0.16)                                   | 15          | 0.77 (0.45,1.32)      | -4.01 (-23.96,4.74)                                     |
| Acute aseptic arthritis                                         | 322       | 6     | 2.72 (1.00,7.42)      | 3.05 (-0.01,7.68)                                       | 4           | 1.69 (0.58,4.94)      | 1.97 (-6.52,7.08)                                       |
| <b>Cardiovascular diseases</b>                                  | 3766      | 55    | 0.82 (0.59,1.13)      | -12.03 (-45.82,7.78)                                    | 41          | 0.86 (0.61,1.20)      | -9.16 (-42.76,11.22)                                    |
| Heart failure                                                   | 1752      | 20    | 0.93 (0.52,1.66)      | -1.10 (-19.51,8.53)                                     | 11          | 0.84 (0.44,1.60)      | -2.82 (-26.94,8.07)                                     |
| Coronary artery disease                                         | 2065      | 19    | 0.58 (0.34,0.98)      | -15.70 (-56.47,-0.35)                                   | 21          | 0.78 (0.48,1.26)      | -6.04 (-31.22,6.00)                                     |
| Arrhythmia                                                      | 1788      | 35    | 1.10 (0.71,1.70)      | 2.30 (-14.21,14.13)                                     | 17          | 0.76 (0.45,1.30)      | -8.15 (-42.67,8.02)                                     |
| <b>Circulatory system</b>                                       | 3567      | 34    | 0.62 (0.42,0.91)      | -22.64 (-64.31,-2.88)                                   | 31          | 0.69 (0.47,1.00)      | -16.49 (-51.78,0.11)                                    |
| Thromboembolism                                                 | 3351      | 33    | 0.62 (0.42,0.92)      | -21.51 (-62.26,-2.44)                                   | 30          | 0.71 (0.48,1.04)      | -14.53 (-48.62,1.77)                                    |
| Haemorrhagic disease                                            | 461       | 7     | 0.93 (0.24,3.65)      | -0.36 (-28.06,6.27)                                     | 2           | 0.19 (0.03,1.37)      | -19.55 (-323.54,2.34)                                   |
| <b>Hepato-renal system</b>                                      | 925       | 9     | 0.69 (0.33,1.45)      | -2.61 (-21.21,3.25)                                     | 2           | 0.22 (0.05,0.91)      | -20.81 (-185.87,-0.31)                                  |
| Acute pancreatitis                                              | 220       | 3     | 0.93 (0.28,3.13)      | -0.20 (-16.21,4.27)                                     | 3           | 0.78 (0.23,2.63)      | -0.79 (-20.58,3.89)                                     |
| <b>Nerves and central nervous system</b>                        | 478       | 8     | 0.78 (0.35,1.74)      | -1.95 (-21.63,4.95)                                     | 6           | 0.67 (0.29,1.58)      | -3.36 (-28.88,4.27)                                     |
| Bell's Palsy                                                    | 204       | 8     | 1.13 (0.48,2.64)      | 0.72 (-11.44,6.67)                                      | 5           | 0.88 (0.34,2.29)      | -0.83 (-20.79,6.05)                                     |
| <b>Respiratory system (Acute respiratory distress syndrome)</b> | 1132      | 5     | 0.34 (0.12,0.95)      | -14.76 (-88.22,-0.23)                                   | 11          | 0.98 (0.52,1.85)      | -0.17 (-11.70,5.77)                                     |
| <b>Acute diabetes complications</b>                             | 2868      | 32    | 0.74 (0.47,1.14)      | -9.38 (-37.85,4.22)                                     | 21          | 0.68 (0.42,1.09)      | -12.34 (-46.35,2.73)                                    |
| Hypoglycemia                                                    | 2136      | 22    | 0.68 (0.39,1.17)      | -8.77 (-39.36,3.74)                                     | 16          | 0.77 (0.45,1.30)      | -5.65 (-30.93,5.87)                                     |
| Hyperosmolar hyperglycemic syndrome                             | 1051      | 15    | 1.22 (0.67,2.21)      | 1.91 (-7.86,8.82)                                       | 7           | 0.65 (0.28,1.53)      | -5.74 (-42.42,5.60)                                     |

Notes: IRR = Incidence rate ratio; CI = confidence interval. Adjusted IRR was obtained from conditional Poisson regression adjusted for seasonal effect from self-controlled case series analysis.

**Supplementary Table 7. Adjusted incidence rate ratio and risk difference of adverse event of special interest and acute diabetes complications after vaccination of BNT162b2 and CoronaVac with vaccination before Dec 31,2021**

|                                                                 | Reference |       | First dose            |                                                         | Second dose |                       |                        |
|-----------------------------------------------------------------|-----------|-------|-----------------------|---------------------------------------------------------|-------------|-----------------------|------------------------|
|                                                                 | Event     | Event | Adjusted IRR (95% CI) | Risk difference (95% CI), incidence per 100,000 persons | Event       | Adjusted IRR (95% CI) |                        |
| <b>BNT162b2</b>                                                 |           |       |                       |                                                         |             |                       |                        |
| <b>Overall adverse event of special interest</b>                | 4211      | 51    | 0.86 (0.64,1.16)      | -21.82 (-90.52,21.20)                                   | 56          | 1.00 (0.75,1.33)      | -0.35 (-53.00,39.03)   |
| <b>Autoimmune disease</b>                                       | 878       | 26    | 1.13 (0.74,1.73)      | 3.97 (-16.47,19.75)                                     | 13          | 0.60 (0.33,1.07)      | -22.92 (-93.27,3.22)   |
| Narcolepsy                                                      | 579       | 21    | 1.04 (0.65,1.68)      | 1.11 (-21.98,16.18)                                     | 12          | 0.62 (0.34,1.13)      | -17.80 (-79.21,4.59)   |
| Acute aseptic arthritis                                         | 288       | 5     | 1.64 (0.60,4.52)      | 2.26 (-8.00,9.25)                                       | 2           | 0.79 (0.16,3.97)      | -1.55 (-64.06,8.88)    |
| <b>Cardiovascular diseases</b>                                  | 3361      | 23    | 0.76 (0.48,1.18)      | -17.91 (-76.59,11.06)                                   | 36          | 1.23 (0.86,1.77)      | 10.50 (-11.64,31.09)   |
| Heart failure                                                   | 1605      | 6     | 0.87 (0.36,2.12)      | -1.87 (-37.15,10.86)                                    | 9           | 1.19 (0.58,2.46)      | 1.98 (-15.13,12.18)    |
| Coronary artery disease                                         | 1890      | 9     | 0.48 (0.24,0.95)      | -31.47 (-127.82,-1.10)                                  | 23          | 1.31 (0.83,2.09)      | 6.89 (-8.61,21.26)     |
| Arrhythmia                                                      | 1554      | 19    | 1.22 (0.73,2.04)      | 4.69 (-13.98,19.00)                                     | 12          | 0.88 (0.47,1.62)      | -3.75 (-41.73,14.32)   |
| <b>Circulatory system</b>                                       | 3177      | 27    | 0.93 (0.61,1.41)      | -4.26 (-45.43,20.92)                                    | 34          | 1.18 (0.81,1.71)      | 8.38 (-17.12,29.94)    |
| Thromboembolism                                                 | 2976      | 23    | 0.83 (0.53,1.30)      | -10.25 (-58.36,15.48)                                   | 33          | 1.21 (0.83,1.77)      | 8.82 (-13.98,28.85)    |
| Haemorrhagic disease                                            | 434       | 6     | 2.05 (0.89,4.71)      | 4.35 (-1.87,12.29)                                      | 4           | 1.73 (0.60,5.03)      | 3.59 (-10.55,12.50)    |
| <b>Hepato-renal system</b>                                      | 848       | 2     | 0.33 (0.08,1.32)      | -9.39 (-120.76,2.54)                                    | 3           | 0.61 (0.18,2.01)      | -2.89 (-46.63,5.33)    |
| <b>Nerves and central nervous system</b>                        | 395       | 4     | 0.97 (0.32,2.97)      | -0.23 (-33.22,10.30)                                    | 6           | 1.57 (0.57,4.30)      | 3.05 (-11.73,11.91)    |
| Generalized convulsion                                          | 243       | 2     | 0.85 (0.17,4.26)      | -0.72 (-47.29,7.46)                                     | 3           | 1.38 (0.29,6.51)      | 1.15 (-23.59,8.25)     |
| <b>Respiratory system (Acute respiratory distress syndrome)</b> | 1087      | 5     | 0.41 (0.17,0.98)      | -11.94 (-74.20,-0.06)                                   | 5           | 0.45 (0.17,1.19)      | -9.91 (-72.63,2.48)    |
| <b>Acute diabetes complications</b>                             | 2503      | 10    | 0.39 (0.20,0.77)      | -42.70 (-155.65,-5.57)                                  | 23          | 0.94 (0.56,1.58)      | -1.77 (-30.75,14.30)   |
| Hypoglycemia                                                    | 1862      | 6     | 0.41 (0.17,0.98)      | -30.02 (-149.61,-0.26)                                  | 19          | 1.26 (0.69,2.31)      | 4.26 (-13.90,17.29)    |
| Hyperosmolar hyperglycemic syndrome                             | 922       | 5     | 0.46 (0.15,1.36)      | -8.86 (-77.87,3.71)                                     | 4           | 0.43 (0.14,1.38)      | -9.71 (-89.11,3.86)    |
| <b>CoronaVac</b>                                                |           |       |                       |                                                         |             |                       |                        |
| <b>Overall adverse event of special interest</b>                | 4434      | 67    | 0.82 (0.63,1.06)      | -26.08 (-81.86,8.15)                                    | 60          | 0.79 (0.60,1.04)      | -31.76 (-94.87,5.41)   |
| <b>Autoimmune disease</b>                                       | 891       | 17    | 0.71 (0.42,1.20)      | -9.81 (-45.40,5.43)                                     | 20          | 0.85 (0.53,1.35)      | -4.41 (-29.57,8.62)    |
| Narcolepsy                                                      | 575       | 11    | 0.54 (0.29,1.02)      | -14.09 (-60.72,0.58)                                    | 15          | 0.77 (0.45,1.32)      | -4.92 (-29.83,5.98)    |
| Acute aseptic arthritis                                         | 296       | 6     | 2.72 (1.00,7.40)      | 3.92 (-0.02,9.87)                                       | 4           | 1.72 (0.59,5.03)      | 2.59 (-8.06,9.14)      |
| <b>Cardiovascular diseases</b>                                  | 3527      | 41    | 0.82 (0.59,1.16)      | -12.53 (-51.16,9.81)                                    | 41          | 0.87 (0.62,1.23)      | -8.74 (-45.15,13.46)   |
| Heart failure                                                   | 1660      | 11    | 0.84 (0.43,1.65)      | -2.59 (-27.63,8.20)                                     | 11          | 0.84 (0.44,1.60)      | -2.63 (-26.38,7.80)    |
| Coronary artery disease                                         | 1934      | 16    | 0.60 (0.35,1.03)      | -16.65 (-63.58,0.90)                                    | 21          | 0.80 (0.50,1.30)      | -6.23 (-35.45,8.01)    |
| Arrhythmia                                                      | 1670      | 25    | 1.08 (0.68,1.71)      | 2.01 (-16.98,15.16)                                     | 17          | 0.77 (0.45,1.33)      | -7.88 (-44.29,8.98)    |
| <b>Circulatory system</b>                                       | 3354      | 31    | 0.67 (0.46,0.97)      | -21.95 (-66.84,-0.95)                                   | 31          | 0.70 (0.48,1.02)      | -18.61 (-60.57,1.33)   |
| Thromboembolism                                                 | 3149      | 30    | 0.67 (0.46,0.98)      | -20.78 (-64.61,-0.56)                                   | 30          | 0.72 (0.49,1.06)      | -16.32 (-56.85,3.27)   |
| Haemorrhagic disease                                            | 446       | 7     | 0.96 (0.24,3.77)      | -0.25 (-34.25,8.12)                                     | 2           | 0.19 (0.03,1.40)      | -24.39 (-406.20,3.17)  |
| <b>Hepato-renal system</b>                                      | 882       | 8     | 0.76 (0.36,1.60)      | -2.18 (-22.41,4.72)                                     | 2           | 0.22 (0.05,0.92)      | -23.90 (-220.74,-0.29) |
| Acute pancreatitis                                              | 203       | 3     | 0.96 (0.29,3.22)      | -0.15 (-20.12,5.57)                                     | 3           | 0.79 (0.23,2.66)      | -1.01 (-26.58,5.04)    |
| <b>Nerves and central nervous system</b>                        | 451       | 8     | 0.86 (0.40,1.84)      | -1.41 (-21.99,6.82)                                     | 6           | 0.68 (0.29,1.61)      | -4.11 (-36.34,5.64)    |
| Bell's Palsy                                                    | 183       | 8     | 1.29 (0.58,2.85)      | 1.80 (-10.00,8.97)                                      | 5           | 0.92 (0.35,2.40)      | -0.71 (-25.32,8.05)    |
| <b>Respiratory system (Acute respiratory distress syndrome)</b> | 1094      | 4     | 0.35 (0.13,0.97)      | -17.38 (-107.07,-0.15)                                  | 11          | 0.99 (0.53,1.88)      | -0.06 (-13.92,7.20)    |
| <b>Acute diabetes complications</b>                             | 2645      | 24    | 0.77 (0.50,1.20)      | -8.43 (-38.45,6.24)                                     | 21          | 0.68 (0.43,1.09)      | -13.18 (-51.14,3.27)   |
| Hypoglycemia                                                    | 1975      | 16    | 0.73 (0.43,1.25)      | -7.22 (-37.21,5.66)                                     | 16          | 0.77 (0.45,1.31)      | -5.93 (-33.99,6.68)    |
| Hyperosmolar hyperglycemic syndrome                             | 967       | 13    | 1.23 (0.66,2.27)      | 2.32 (-9.71,10.77)                                      | 7           | 0.66 (0.28,1.55)      | -6.55 (-50.12,6.81)    |

Notes: IRR = Incidence rate ratio; CI = confidence interval. Adjusted IRR was obtained from conditional Poisson regression adjusted for seasonal effect from self-controlled case series analysis.

**Supplementary Table 8. Adjusted incidence rate ratio and risk difference of adverse event of special interest and acute diabetes complications (by category) for 21-day follow-up period after vaccination of BNT162b2 and CoronaVac among the patients with HbA1c<7% and ≥7%**

|                                           | Reference |       | First dose            |                                                         | Second dose |                       |                                                         |
|-------------------------------------------|-----------|-------|-----------------------|---------------------------------------------------------|-------------|-----------------------|---------------------------------------------------------|
|                                           | Event     | Event | Adjusted IRR (95% CI) | Risk difference (95% CI), incidence per 100,000 persons | Event       | Adjusted IRR (95% CI) | Risk difference (95% CI), incidence per 100,000 persons |
| <b>HbA1c&lt;7%</b>                        |           |       |                       |                                                         |             |                       |                                                         |
| <b>BNT162b2</b>                           |           |       |                       |                                                         |             |                       |                                                         |
| Overall adverse event of special interest | 2572      | 33    | 0.83 (0.57,1.20)      | -24.02 (-110.01,24.35)                                  | 37          | 1.03 (0.72,1.47)      | 3.12 (-55.65,45.75)                                     |
| Autoimmune disease                        | 568       | 19    | 1.38 (0.84,2.26)      | 8.88 (-8.91,26.10)                                      | 9           | 0.70 (0.34,1.44)      | -13.76 (-89.65,14.21)                                   |
| Cardiovascular diseases                   | 2106      | 12    | 0.56 (0.31,1.04)      | -33.72 (-137.82,2.38)                                   | 23          | 1.18 (0.76,1.83)      | 6.63 (-19.19,27.51)                                     |
| Circulatory system                        | 1811      | 15    | 0.74 (0.41,1.36)      | -15.56 (-90.59,16.46)                                   | 22          | 1.24 (0.77,1.98)      | 8.73 (-18.22,30.94)                                     |
| Nerves and central nervous system         | 254       | 2     | 0.70 (0.16,3.04)      | -2.92 (-76.97,9.78)                                     | 4           | 1.52 (0.44,5.26)      | 2.28 (-18.73,11.79)                                     |
| Respiratory system                        | 709       | 5     | 0.58 (0.23,1.44)      | -6.33 (-56.28,5.22)                                     | 3           | 0.39 (0.11,1.34)      | -13.74 (-134.97,4.32)                                   |
| Acute diabetes complications              | 963       | 2     | 0.17 (0.04,0.75)      | -59.41 (-544.00,-2.04)                                  | 9           | 1.22 (0.58,2.56)      | 2.20 (-15.40,13.17)                                     |
| <b>CoronaVac</b>                          |           |       |                       |                                                         |             |                       |                                                         |
| Overall adverse event of special interest | 2825      | 43    | 0.66 (0.46,0.96)      | -44.12 (-127.58,-3.12)                                  | 34          | 0.72 (0.50,1.05)      | -33.59 (-109.81,4.76)                                   |
| Autoimmune disease                        | 582       | 14    | 0.88 (0.47,1.64)      | -2.94 (-35.00,12.21)                                    | 14          | 1.02 (0.58,1.80)      | 0.52 (-22.17,13.83)                                     |
| Cardiovascular diseases                   | 2295      | 35    | 0.72 (0.47,1.09)      | -20.39 (-74.55,5.49)                                    | 25          | 0.82 (0.52,1.29)      | -11.20 (-60.39,14.86)                                   |
| Circulatory system                        | 1982      | 19    | 0.64 (0.38,1.09)      | -13.83 (-58.47,2.89)                                    | 10          | 0.40 (0.21,0.76)      | -37.10 (-133.24,-5.23)                                  |
| Hepato-renal system                       | 532       | 6     | 0.71 (0.26,1.93)      | -2.37 (-33.55,5.64)                                     | 1           | 0.17 (0.02,1.27)      | -27.05 (-482.08,2.51)                                   |
| Nerves and central nervous system         | 291       | 3     | 0.51 (0.14,1.95)      | -4.29 (-63.04,4.80)                                     | 3           | 0.64 (0.20,2.10)      | -2.53 (-40.52,5.17)                                     |
| Respiratory system                        | 724       | 4     | 0.39 (0.12,1.25)      | -10.52 (-92.60,2.53)                                    | 5           | 0.65 (0.25,1.69)      | -3.53 (-37.44,5.17)                                     |
| Acute diabetes complications              | 1068      | 13    | 0.79 (0.40,1.56)      | -4.83 (-40.23,9.52)                                     | 11          | 0.99 (0.53,1.84)      | -0.20 (-23.32,12.10)                                    |
| <b>HbA1c≥7%</b>                           |           |       |                       |                                                         |             |                       |                                                         |
| <b>BNT162b2</b>                           |           |       |                       |                                                         |             |                       |                                                         |
| Overall adverse event of special interest | 1655      | 18    | 0.79 (0.45,1.36)      | -33.99 (-206.72,45.36)                                  | 18          | 0.90 (0.55,1.50)      | -13.30 (-143.47,57.11)                                  |
| Autoimmune disease                        | 367       | 7     | 0.71 (0.31,1.63)      | -10.64 (-104.18,18.29)                                  | 4           | 0.45 (0.17,1.23)      | -31.97 (-237.01,8.93)                                   |
| Cardiovascular diseases                   | 1261      | 11    | 0.98 (0.46,2.10)      | -1.14 (-106.99,47.37)                                   | 12          | 1.25 (0.65,2.43)      | 12.18 (-49.10,53.07)                                    |
| Circulatory system                        | 1361      | 12    | 1.07 (0.58,1.96)      | 3.70 (-63.73,43.28)                                     | 11          | 1.03 (0.54,1.97)      | 1.62 (-76.07,43.47)                                     |
| Acute diabetes complications              | 1586      | 10    | 0.54 (0.25,1.14)      | -48.29 (-246.24,10.37)                                  | 14          | 0.87 (0.42,1.80)      | -8.17 (-114.37,37.30)                                   |
| <b>CoronaVac</b>                          |           |       |                       |                                                         |             |                       |                                                         |
| Overall adverse event of special interest | 1814      | 36    | 0.98 (0.67,1.43)      | -2.89 (-88.18,54.22)                                    | 24          | 0.81 (0.53,1.25)      | -32.12 (-161.03,36.44)                                  |
| Autoimmune disease                        | 394       | 4     | 0.38 (0.13,1.10)      | -25.54 (-190.68,2.68)                                   | 6           | 0.60 (0.26,1.40)      | -10.55 (-84.06,8.25)                                    |
| Cardiovascular diseases                   | 1370      | 19    | 0.99 (0.58,1.68)      | -0.73 (-59.04,33.11)                                    | 14          | 0.82 (0.47,1.44)      | -12.46 (-91.25,24.84)                                   |
| Circulatory system                        | 1492      | 15    | 0.63 (0.36,1.11)      | -36.54 (-155.50,8.91)                                   | 21          | 1.14 (0.70,1.85)      | 7.68 (-36.57,39.77)                                     |
| Hepato-renal system                       | 371       | 4     | 0.95 (0.35,2.56)      | -0.47 (-36.12,11.84)                                    | 1           | 0.32 (0.04,2.49)      | -17.48 (-445.60,11.61)                                  |
| Nerves and central nervous system         | 172       | 5     | 1.34 (0.47,3.87)      | 2.76 (-25.31,16.44)                                     | 2           | 0.66 (0.14,3.12)      | -5.65 (-138.74,15.06)                                   |
| Respiratory system                        | 388       | 1     | 0.29 (0.04,2.27)      | -25.47 (-553.07,12.12)                                  | 6           | 1.85 (0.79,4.34)      | 4.84 (-5.79,16.69)                                      |
| Acute diabetes complications              | 1754      | 18    | 0.64 (0.35,1.15)      | -24.87 (-115.81,8.28)                                   | 10          | 0.48 (0.24,0.98)      | -47.03 (-203.79,-0.58)                                  |

Notes: IRR = Incidence rate ratio; CI = confidence interval. Adjusted IRR was obtained from conditional Poisson regression adjusted for seasonal effect from self-controlled case series analysis.
